# Supplementary material for: Antimicrobial Stewardship for Outpatients with Chronic Bone and Joint Infections in the Orthopaedic Clinic of an Academic Tertiary Hospital, South Africa
Source: MDPI journal article supplement (doi:10.3390/antibiotics12071142), 2023-07-01
Supplement: s1 [file s1]

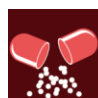

## Supplementary Material

Table S1. Adherence to Refills and Medication scale (ARMS) questionnaire.

| Questions                                                                                                                             | None of the time | Some of the time | Most of the time | All of the time |
|---------------------------------------------------------------------------------------------------------------------------------------|------------------|------------------|------------------|-----------------|
| How often do you forget to take your medicine?                                                                                        |                  |                  |                  |                 |
| How often do you decide not to take your medicine?                                                                                    |                  |                  |                  |                 |
| How often do you forget to get prescriptions filled?                                                                                  |                  |                  |                  |                 |
| How often do you run out of medicine?                                                                                                 |                  |                  |                  |                 |
| How often do you skip a dose of your medicine before you go to the doctor?                                                            |                  |                  |                  |                 |
| How often do you miss taking your medicine when you feel better?                                                                      |                  |                  |                  |                 |
| How often do you miss taking your medicine when you feel sick?                                                                        |                  |                  |                  |                 |
| How often do you miss taking your medicine when you are not paying attention to your regimen?                                         |                  |                  |                  |                 |
| How often do you change the dose of your medicines to suit your needs (like when you take more or less pill than you're supposed to)? |                  |                  |                  |                 |
| How often do you forget to take your medicine when you are supposed to take it more than once a day?                                  |                  |                  |                  |                 |
| How often do you put off refilling your medicines because of cost?                                                                    |                  |                  |                  |                 |
| How often do you plan ahead and refill your medicines before they run out?                                                            |                  |                  |                  |                 |

**Table S2.** Knowledge of the condition and medication checklist.

| Questions                                                                   | Possible answers<br>(Tick “√”)                                                                                                                                 | Other | “Don’t Know” |
|-----------------------------------------------------------------------------|----------------------------------------------------------------------------------------------------------------------------------------------------------------|-------|--------------|
| <b>Knowledge of condition</b>                                               |                                                                                                                                                                |       |              |
| What is the name of your condition/what is the diagnosis of your condition? | Bone infection<br>Osteomyelitis<br>Septic Arthritis                                                                                                            |       |              |
| What are the common signs and symptoms of your condition?                   | Tenderness of the affected area<br>Pain<br>Swelling<br>Fever<br>Chills<br>Decreased motion<br>Discomfort                                                       |       |              |
| What caused your condition?                                                 | Infection<br>Trauma<br>Genetics<br>Age                                                                                                                         |       |              |
| <b>Knowledge of medication</b>                                              |                                                                                                                                                                |       |              |
| What is the purpose of your medicine treatment?                             | Eradicate infection<br>Alleviate pain/<br>Antibiotic - it eradicates the infection by killing the bacteria<br>Analgesic - Pain reliever and also reduces fever |       |              |
| How many doses do you take?/<br>How many tablets do you take?               | 1<br>2<br>3<br>4                                                                                                                                               |       |              |
| How many times a day do you take your medication?                           | 3 times a day<br>4 times a day                                                                                                                                 |       |              |
| Which route of administration do you use to administer your medications?    | Oral                                                                                                                                                           |       |              |
| What are the common side effects you can experience with your medication?   | Antibiotics:<br>Gastrointestinal disturbances(GI) (stomach cramps, nausea, vomiting, diarrhoea), hypersensitivity reactions<br>Analgesics: GI disturbances     |       |              |
| For how long is your treatment going to be?                                 | 1 week<br>1 month<br>6 months                                                                                                                                  |       |              |

**Table S3** Demographics and clinical data form.

|                                |                |                                         |            |                            |                     |
|--------------------------------|----------------|-----------------------------------------|------------|----------------------------|---------------------|
| <b>Demographic details:</b>    |                |                                         |            |                            |                     |
| Date:                          |                |                                         |            |                            |                     |
| File number:                   |                |                                         |            |                            |                     |
| <b>Level of education</b>      | Primary school | High school                             | University | Other institutions         | No formal education |
| Age (years):                   |                | Sex (M/F):                              |            | Occupation:                |                     |
| Other chronic conditions:      |                |                                         |            |                            |                     |
| <b>Clinical data:</b>          |                |                                         |            |                            |                     |
| Diagnosis                      |                |                                         |            |                            |                     |
| Date of Diagnosis              |                |                                         |            |                            |                     |
| Microbiological test findings  |                |                                         |            |                            |                     |
|                                |                |                                         |            |                            |                     |
| <b>Prescribed treatment</b>    |                | <b>Treatment according to guideline</b> |            | <b>Treatment dispensed</b> |                     |
|                                |                | YES                                     | NO         |                            |                     |
| 1.                             |                |                                         |            |                            |                     |
| 2.                             |                |                                         |            |                            |                     |
| 3.                             |                |                                         |            |                            |                     |
| 4.                             |                |                                         |            |                            |                     |
| Intervention needed (tick “√”) |                | YES                                     |            | NO                         |                     |
| Drug change                    |                |                                         |            |                            |                     |
| Correct dose                   |                |                                         |            |                            |                     |
| Correct duration               |                |                                         |            |                            |                     |
| Other                          |                |                                         |            |                            |                     |
| Intervention accepted          |                | YES                                     |            | NO                         |                     |

**Table S4.** Organisms cultured and the treatment prescribed and dispensed after interventions.

| Study No. | Cultures                                           | Prescribed Antibiotic/s   | Intervention Necessary | Motivation for Intervention                    | Antibiotic Dispensed                                |
|-----------|----------------------------------------------------|---------------------------|------------------------|------------------------------------------------|-----------------------------------------------------|
| 1         | Coagulase negative <i>Staphylococcus aureus</i>    | Cloxacillin 2g po qid     | Yes                    | Drug change                                    | Flucloxacillin 2g po qid                            |
| 2         | <i>Staphylococcus aureus</i>                       | Rifampicin 150mg po dly   | Yes                    | Drug addition, Correct dose, Correct frequency | Rifampicin 300mg po bd<br>Ciprofloxacin 500mg po bd |
| 3         | No microbiology tests conducted                    | Rifampicin 300mg po dly   | Yes                    | Correct dose, Correct frequency                | Rifampicin 300mg po bd                              |
|           |                                                    | Cloxacillin 1g po qid     | Yes                    | Drug change                                    | Flucloxacillin 1g po qid                            |
| 4         | <i>Staphylococcus aureus</i>                       | Flucloxacillin 2g po qid  | No                     |                                                | Flucloxacillin 1g po qid                            |
|           |                                                    | Rifampicin 600mg po dly   | No                     |                                                |                                                     |
| 5         | Coagulase negative <i>Staphylococcus aureus</i>    | Cloxacillin 500mg po tds  | Yes                    | Drug change                                    | Ciprofloxacin 500mg po bd                           |
|           |                                                    | Rifampicin 300mg po dly   | Yes                    | Correct frequency                              | Rifampicin 300mg po bd                              |
| 6         | No growth observed                                 | Flucloxacillin 1g po qid  | No                     |                                                | Flucloxacillin 1g po qid                            |
| 7         | <i>Staphylococcus aureus</i>                       | Flucloxacillin 2g po qid  | No                     |                                                | Flucloxacillin 2g po qid                            |
| 8         | No growth observed                                 | Flucloxacillin 2g po qid  | No                     |                                                | Flucloxacillin 2g po qid                            |
| 9         | Coagulase negative <i>Staphylococcus aureus</i>    | Flucloxacillin 2g po qid  | No                     |                                                | Flucloxacillin 2g po qid                            |
|           |                                                    | Rifampicin 600mg po dly   | No                     |                                                |                                                     |
| 10        | <i>Staphylococcus aureus</i>                       | Flucloxacillin 2g po qid  | No                     |                                                | Flucloxacillin 2g po qid                            |
| 11        | No growth observed                                 | Rifampicin 300mg po bd    | No                     |                                                | Rifampicin 300mg po bd                              |
|           |                                                    | Ciprofloxacin 500mg po bd | No                     |                                                | Ciprofloxacin 500mg po bd                           |
| 12        | Methicillin Resistant <i>Staphylococcus aureus</i> | Ciprofloxacin 500mg bd    | Yes                    | Not covered by antibiotic*                     | Ciprofloxacin 500mg po bd                           |
|           |                                                    | Rifampicin 300mg po bd    |                        |                                                | Rifampicin 300mg po bd                              |
| 13        | <i>Staphylococcus aureus</i>                       | Ciprofloxacin 500mg bd    | No                     |                                                | Ciprofloxacin 500mg po bd                           |
|           |                                                    | Rifampicin 300mg po bd    | No                     |                                                | Rifampicin 300mg po bd                              |
| 14        | No microbiology tests conducted                    | Ciprofloxacin 500mg bd    | No                     |                                                | Ciprofloxacin 500mg po bd                           |
|           |                                                    | Rifampicin 300mg po bd    | No                     |                                                | Rifampicin 300mg po bd                              |

|    |                                                                                    |                                          |     |                             |                                       |
|----|------------------------------------------------------------------------------------|------------------------------------------|-----|-----------------------------|---------------------------------------|
| 15 | No growth observed                                                                 | Amoxicillin./clavulanic acid 1.2g po tds | No  |                             | Amoxicillin/clavulanic acid 1g po tds |
| 16 | Methicillin resistant <i>Staphylococcus aureus</i>                                 | Ciprofloxacin 500mg bd                   | Yes | Not covered by anti-biotic* | Ciprofloxacin 500mg po bd             |
|    |                                                                                    | Rifampicin 300mg po bd                   | No  |                             | Rifampicin 300mg po bd                |
| 17 | <i>Pseudomonas aeruginosa</i> and <i>Morganella morganii</i> subsp <i>morganii</i> | Cloxacillin 1g po qid                    | Yes | Drug change                 | Ciprofloxacin 750mg bd                |
| 18 | No microbiology tests conducted                                                    | Flucloxacillin 1g po qid                 | No  |                             | Flucloxacillin 1g po qid              |
| 19 | No microbiology tests conducted                                                    | Ciprofloxacin 500mg bd                   | No  |                             | Ciprofloxacin 500mg bd                |
|    |                                                                                    | Rifampicin 300mg po bd                   | No  |                             | Rifampicin 300mg po bd                |
| 20 | No microbiology tests conducted                                                    | Cloxacillin 1g po qid                    | Yes | Drug change                 | Flucloxacillin 1g po qid              |
| 21 | No microbiology tests conducted                                                    | Ciprofloxacin 500mg bd                   | No  |                             | Ciprofloxacin 500mg bd                |
|    |                                                                                    | Rifampicin 300mg po bd                   | No  |                             | Rifampicin 300mg po bd                |
| 22 | No growth observed                                                                 | Cloxacillin 1g po qid                    | Yes | Drug change                 | Flucloxacillin 1g po qid              |
| 23 | <i>Pseudomonas aeruginosa</i>                                                      | Ciprofloxacin 500mg bd                   | No  |                             | Ciprofloxacin 500mg bd                |
|    |                                                                                    | Rifampicin 300mg po bd                   | No  |                             | Rifampicin 300mg po bd                |
| 24 | <i>Proteus mirabilis</i> and <i>Escherichia coli</i>                               | Cloxacillin 1g po qid                    | No  | Drug change                 | Ciprofloxacin 750mg bd                |
| 25 | <i>Staphylococcus aureus</i>                                                       | Amoxicillin./clavulanic acid 1.2g po bd  | No  |                             | Amoxicillin/clavulanic acid 1g po bd  |
| 26 | <i>Pseudomonas aeruginosa</i>                                                      | Cloxacillin 1g po qid                    | Yes | Drug change                 | Ciprofloxacin 750mg bd                |
|    |                                                                                    | Rifampicin 300mg po bd                   | No  |                             | Rifampicin 300mg po bd                |
| 27 | <i>Staphylococcus aureus</i>                                                       | Cloxacillin 1g po qid                    | Yes | Drug change                 | Flucloxacillin 1g po qid              |
| 28 | No microbiology tests conducted                                                    | Ciprofloxacin 500mg bd                   | No  |                             | Ciprofloxacin 500mg bd                |
|    |                                                                                    | Rifampicin 300mg po bd                   | No  |                             | Rifampicin 300mg po bd                |
| 29 | No microbiology tests conducted                                                    | Ciprofloxacin 500mg bd                   | No  |                             | Rifampicin 300mg po bd                |
|    |                                                                                    | Rifampicin 300mg po bd                   | No  |                             |                                       |
| 30 | <i>Staphylococcus aureus</i> and <i>Enterobacter cloacae</i> complex               | Cloxacillin 1g po qid                    | Yes | Drug change                 | Flucloxacillin 1g po qid              |
| 31 | <i>Enterobacter cloacae</i> complex                                                | Ciprofloxacin 500mg bd                   | No  |                             | Ciprofloxacin 500mg bd                |
|    |                                                                                    | Rifampicin 300mg po bd                   | No  |                             | Rifampicin 300mg po bd                |

|    |                                 |                          |     |              |                          |
|----|---------------------------------|--------------------------|-----|--------------|--------------------------|
|    |                                 |                          |     |              |                          |
| 32 | No growth observed              | Cloxacillin 1g po qid    | Yes | Drug change  | Flucloxacillin 1g po qid |
|    |                                 | Rifampicin 300mg po dly  | Yes | Correct dose | Rifampicin 300mg po bd   |
| 33 | No growth observed              | Ciprofloxacin 500mg bd   | No  |              | Ciprofloxacin 500mg bd   |
|    |                                 | Rifampicin 600mg po dly  | No  |              | Rifampicin 600mg po dly  |
| 34 | <i>Staphylococcus aureus</i>    | Cloxacillin 1g po qid    | Yes | Drug change  | Flucloxacillin 1g po qid |
| 35 | No microbiology tests conducted | Ciprofloxacin 500mg bd   | No  |              | Ciprofloxacin 500mg bd   |
|    |                                 | Rifampicin 300mg po bd   | No  |              | Rifampicin 300mg po bd   |
| 36 | No microbiology tests conducted | Ciprofloxacin 500mg bd   | No  |              | Ciprofloxacin 500mg bd   |
|    |                                 | Rifampicin 300mg po bd   | No  |              | Rifampicin 300mg po bd   |
| 37 | <i>Escherichia coli</i>         | Cloxacillin 1g po qid    | Yes | Drug change  | Flucloxacillin 1g po qid |
|    |                                 | Rifampicin 300mg po dly  | Yes | Correct dose | Rifampicin 300mg po bd   |
| 38 | No microbiology tests conducted | Cloxacillin 1g po qid    | No  | Drug change  | Flucloxacillin 1g po qid |
| 39 | <i>Staphylococcus aureus</i>    | Flucloxacillin 2g po qid | No  |              | Flucloxacillin 2g po qid |
|    |                                 | Rifampicin 600mg po dly  | No  |              | Rifampicin 600mg po dly  |
| 40 | No microbiology tests conducted | Ciprofloxacin 500mg bd   | No  |              | Ciprofloxacin 500mg bd   |
|    |                                 | Rifampicin 300mg po bd   | No  |              | Rifampicin 300mg po bd   |
| 41 | No microbiology tests conducted | Flucloxacillin 1g po qid | No  |              | Flucloxacillin 1g po qid |
|    |                                 | Rifampicin 300mg po bd   | No  |              | Rifampicin 300mg po bd   |
| 42 | <i>Proteus mirabilis</i>        | Ciprofloxacin 500mg bd   | No  |              | Ciprofloxacin 500mg bd   |
|    |                                 | Rifampicin 300mg po bd   | No  |              | Rifampicin 300mg po bd   |
| 43 | <i>Staphylococcus aureus</i>    | Flucloxacillin 2g po qid | No  |              | Flucloxacillin 2g po qid |
|    |                                 | Rifampicin 600mg po dly  | No  |              | Rifampicin 600mg po dly  |
| 44 | <i>Pseudomonas aeruginosa</i>   | Flucloxacillin 1g po tds | Yes | Drug change  | Ciprofloxacin 500mg bd   |
|    |                                 | Rifampicin 300mg po bd   | No  |              | Rifampicin 300mg po bd   |

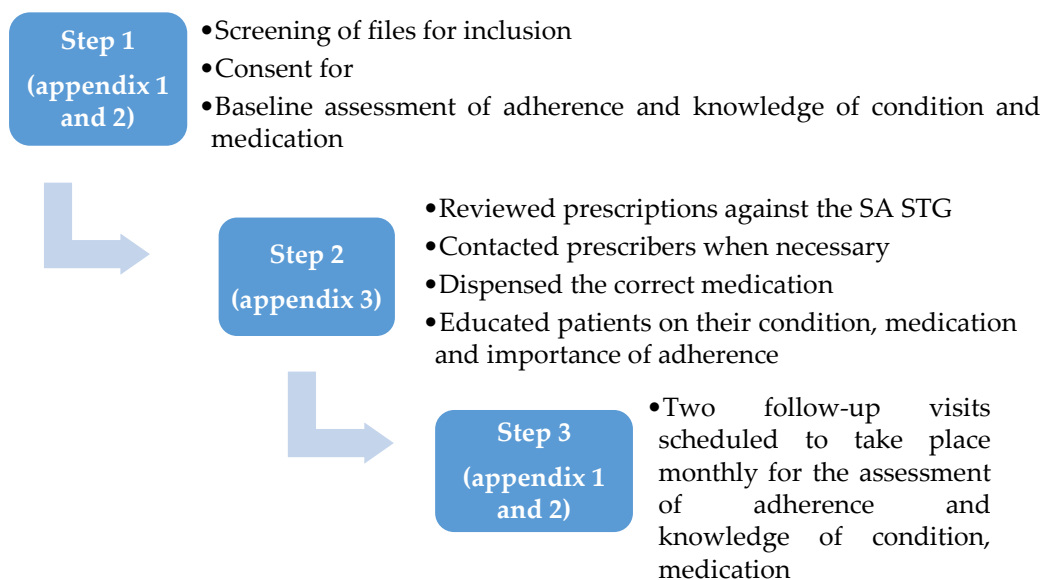

**Figure S1.** Flow diagram of data collection procedure.
